# Supplementary material for: Implementing a Parallel Image Edge Detection Algorithm Based on the Otsu-Canny Operator on the Hadoop Platform
Source: Hindawi journal article supplement (doi:10.1155/2018/3598284), 2018-01-01
Supplement: f1 [file 3598284.f1.pdf]

**Attachment:**

The core source code of the edge detection of the Otsu-Canny operator in the Hadoop platform (ImageCanny.java)

//Map task is as follows.

```
package bishe;

import java.io.IOException;

import org.apache.hadoop.fs.Path;

import org.apache.hadoop.io.Text;

import org.apache.hadoop.mapreduce.Job;

import org.apache.hadoop.mapreduce.Mapper;

import org.apache.hadoop.mapreduce.Mapper.Context;

import org.apache.hadoop.mapreduce.lib.input.FileInputFormat;

import org.apache.hadoop.mapreduce.lib.input.SequenceFileInputFormat;

import org.apache.hadoop.mapreduce.lib.output.FileOutputFormat;

import org.apache.hadoop.mapreduce.lib.output.LazyOutputFormat;

import org.apache.hadoop.mapreduce.lib.output.MultipleOutputs;

import org.opencv.core.Core;

import org.opencv.core.CvType;

import org.opencv.core.Mat;

import org.opencv.imgproc.Imgproc;

import bishe.Image.RawImage;

public class ImageCanny
```

```

{public static class CannyMapper extends Mapper<Text, RawImage, Text, RawImage>

{

    private MultipleOutputs<Text,RawImage> mos;

    protected void setup(Context context) throws IOException, InterruptedException

    {

        super.setup(context);

        mos=new MultipleOutputs<Text,RawImage>(context);

                                                // Create multiple file output objects

    }

    @Override

    protected void map(Text key, RawImage value, Context context)

        throws IOException, InterruptedException

    {

        // TODO Auto-generated method stub

        Path path = new Path(key.toString());

        Text fileName = new Text(path.getName());

        Mat img = value.toMat();

        // Parse the original image file directly into the Mat type with three channels

        Imgproc.cvtColor(img, img, Imgproc.COLOR_BGR2GRAY);

        Mat Cannyop=new Mat();

        Mat dst=Mat.zeros(img.rows(), img.cols(), CvType.CV_8UC(3));

```

```

        double thresh= Imgproc.threshold(img, dst, 0, 255,

                                Imgproc.THRESH_BINARY+Imgproc.THRESH_OTSU);

                                // Get the adaptive threshold using the Otsu algorithm

        Imgproc.Canny(img, Cannyop, 0.5*thresh, thresh);

        // Obtain the edge detection image of the Canny operator and stored it in the Cannyop

        mos.write(fileName, RawImage.toImage(Cannyop),fileName.toString());

                                // Output results to the HDFS

    }

    protected void cleanup(Context context) throws IOException, InterruptedException

    {

        super.cleanup(context);

        mos.close();

    }

}

    public static void main(String[] args) throws IOException, ClassNotFoundException,

    InterruptedException

    {

        Job job = Job.getInstance();

        job.setJobName("ImageCanny");

        job.setJar("ImageCannyTest.jar");

        job.setJarByClass(ImageCanny.class);

```

```

    job.addFileToClassPath(new Path("hdfs://master:9000/opencv-300.jar"));

    job.addFileToClassPath(new Path("hdfs://master:9000/libopencv_java300.so"));

    FileInputFormat.addInputPath(job, new Path("hdfs://master:9000/ImageSeq"));

    FileOutputFormat.setOutputPath(job, new Path("hdfs://master:9000/output"));

    job.setInputFormatClass(SequenceFileInputFormat.class);

    LazyOutputFormat.setOutputFormatClass(job, ImageOutputFormat.class);

    job.setMapperClass(CannyMapper.class);

    job.setOutputKeyClass(Text.class);

    job.setOutputValueClass(RawImage.class);

    job.waitForCompletion(true);
}

}

//Reduce task is as follows.

package bishe;

import java.io.IOException;

import org.apache.hadoop.fs.Path;

import org.apache.hadoop.io.Text;

import org.apache.hadoop.mapreduce.Reducer;

import org.apache.hadoop.mapreduce.lib.output.MultipleOutputs;

import bishe.Image.RawImage;

public class Image_Readuce_Canny extends Reducer <Text, RawImage, Text, RawImage>
{

```

```

private MultipleOutputs<Text,RawImage> mos;

protected void setup(Context context) throws IOException, InterruptedException
{
    super.setup(context);

    mos=new MultipleOutputs<Text,RawImage>(context);
}

protected void reduce(Text key, Iterable<RawImage> values, Context context
                        ) throws IOException, InterruptedException
{
    for(RawImage value: values)
        mos.sort(key,value,key.toString( ));
        mos.write(key,value,key.toString());
}
}

```
